# Supplementary figures and images for: Differential VASP phosphorylation controls remodeling of the actin cytoskeleton
Source: Oxford University Press journal article supplement (doi:10.1242/jcs.044537), 2009-10-14

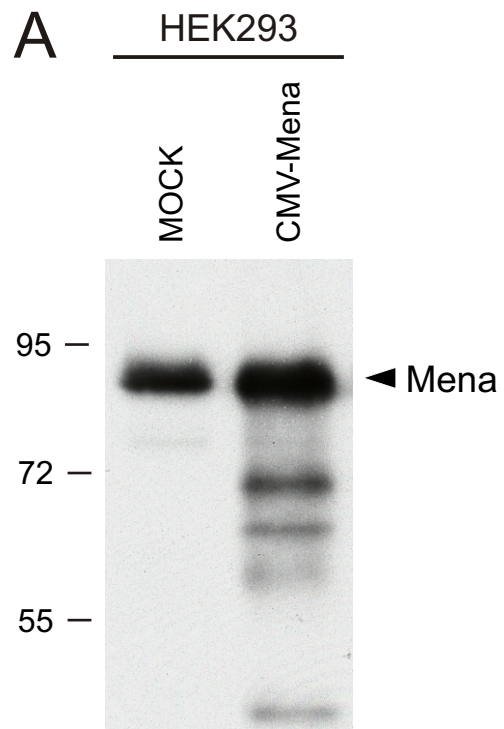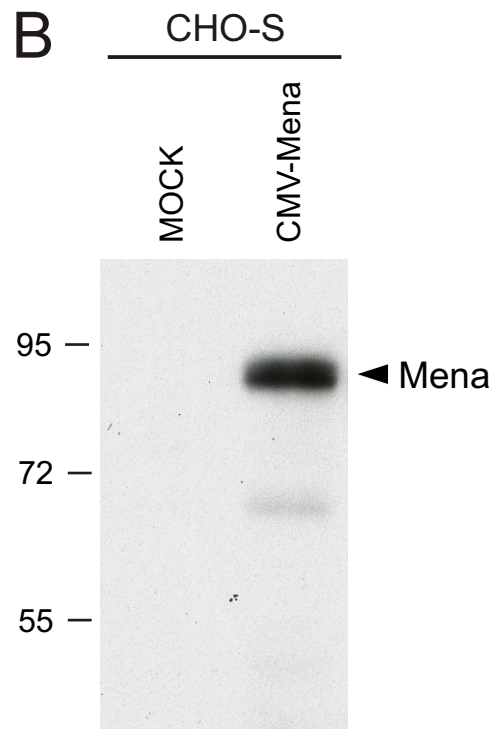

Supplement: jcs044537figs1.pdf [file jcs044537figs1.pdf]
